# Supplementary material for: RBM4a-SRSF3-MAP4K4 Splicing Cascade Constitutes a Molecular Mechanism for Regulating Brown Adipogenesis
Source: MDPI journal article supplement (doi:10.3390/ijms19092646), 2018-09-06
Supplement: s1 [file s1]

## Supplementary Materials

# RBM4a-SRSF3-MAP4K4 Splicing Cascade Constitutes a Molecular Mechanism for Regulating Brown Adipogenesis

Hui-Yu Peng <sup>1</sup>, Yu-Chih Liang <sup>1,2</sup>, Tse-Hua Tan <sup>3</sup>, Huai-Chia Chuang <sup>3</sup>, Ying-Ju Lin <sup>4</sup> and

Jung-Chun Lin <sup>1,2,\*</sup>

<sup>1</sup> School of Medical Laboratory Science and Biotechnology, College of Medical Science and Technology, Taipei Medical University, Taipei 110, Taiwan; m609104003@tmu.edu.tw (H.-Y.P.); ycliang@tmu.edu.tw (Y.-C. L.)

<sup>2</sup> Ph.D. Program in Medicine Biotechnology, College of Medical Science and Technology, Taipei Medical University, Taipei 110, Taiwan

<sup>3</sup> Immunology Research Center, National Health Research Institutes, Zhunan 35053, Taiwan; ttan@nhri.org.tw (T.-H.T.); cinth@nhri.org.tw (H.-C.C.)

<sup>4</sup> School of Chinese Medicine, China Medical University, Taichung 40402, Taiwan; yjlin@mail.cmu.edu.tw

\* Correspondence: lin2511@tmu.edu.tw; Tel.: +886-2-2736-1661 (ext. 3330)

**Supplemental Table S1. PCR Primers.**

| Target                  | Forward                                        | Reverse                                     |
|-------------------------|------------------------------------------------|---------------------------------------------|
| MAP4K4-AS               | agagcccaagcctcactatgac                         | tctgtctgcttggtctattct                       |
| MAP4K4-cDNA             | atcaagcttatggcgaacgactctccgcg                  | atcgaattcccagctcagaagagaagtcct              |
| SRSF3-AS                | gtcccttggttgtaagggt                            | aaaagcttctccttcttggtg                       |
| SRSF3-cDNA              | atcgaattcatgcatcgtgattcctgtc                   | atcgatactttcctttcatttgacctag                |
| SRSF3(F30A) mutant      | acggaattggaacgggctgctggctactatggaccactc        | gagtgggtccatagtagccagcagcccgttccaattccgt    |
| MAP4K4-minigene         | atcgaattccacgaccacaggaggccgcac                 | atcaagcttctggtggaatttctctgtcc               |
| MAP4K4-minigene (E-mut) | ctcaggaccatgtccacgttgccgcagtgaggggctca         | tgagcccctcactgcggcaacgtggacatgggtcctgag     |
| MAP4K4-minigene (I-mut) | cagacagacgcgctgtgtctgtttatttaaactactgt         | acagtaagttaaataaacagacaacagcgcgtctgtctg     |
| SRSF3-minigene          | atcgatatcaacactatgtggctgcgctg                  | atcgagctcctgctccggctgcgagagaag              |
| SRSF3-minigene (E-mut)  | ccggcagcctcacctcaccaatacaagcttgtaaa<br>cccaaaa | ttttgggttcttctgtctgtattggtgaggtgaggctgcccgg |
| SRSF3-minigene (I-mut)  | accctaaactagtaagttatacatgcttatacagtttact       | agtaaaactgtataagcatgtataacttactagttttggt    |
| CMV                     | tgggaggtctatataagcaga                          |                                             |
| GAPDH                   | cggagtcaacggatttggtcgtatg                      | agccttctccatgggtggtgaagac                   |

**Supplemental Table S2. qPCR Primers.**

| Target | Forward                   | Reverse                   |
|--------|---------------------------|---------------------------|
| PRDM16 | gacattccaatcccaccaga      | cacctctgtatccgtcagca      |
| BMP2   | ccaagagacatgtgaggatt      | ttagtggagttcaggtggct      |
| BMP7   | gaaaacagcagcagtgacca      | gggtggcgttcattgtaggagt    |
| UCP1   | tacacggggacctaataatgct    | ggctactggaagatatggc       |
| Cited1 | cgggggtcacgcaaatgga       | ctcatccaccgggtcagaa       |
| Hoxa9  | cagtgtatcatcaccaccacca    | gaggagaaccacaagcatagt     |
| Gapdh  | cggagtcaacggatttggtcgtatg | agccttctccatgggtggtgaagac |
